# Supplementary material for: Population and Demographic Structure of Ixodes scapularis Say in the Eastern United States
Source: PLoS One. 2014 Jul 15;9(7):e101389. doi: 10.1371/journal.pone.0101389 (PMC4099084; doi:10.1371/journal.pone.0101389)
Supplement: Table S2 — 16S sequences used for comparisons. (XLSX) [file pone.0101389.s006.xlsx]

## Sheet: Sheet1
Clade	Sample_label	Genbank_Accession	Description	MS Homology to IsCOI
Western (Outgroup)	I.pacificus	AF309010.1	Ixodes pacificus haplotype SSCP Van_236 16S ribosomal RNA gene, partial sequence; mitochondrial gene for mitochondrial product, 460 bp linear DNA, GI:1201811
Southern	SSCP_M	AF309011.1	Ixodes scapularis haplotype SSCP M 16S ribosomal RNA gene, partial sequence; mitochondrial gene for mitochondrial product, 456 bp linear DNA, GI:12018114
Southern	SSCP_N	AF309012.1	Ixodes scapularis haplotype SSCP N 16S ribosomal RNA gene, partial sequence; mitochondrial gene for mitochondrial product, 456 bp linear DNA, GI:12018115
Southern	SSCP_O	AF309013.1	Ixodes scapularis haplotype SSCP O 16S ribosomal RNA gene, partial sequence; mitochondrial gene for mitochondrial product, 456 bp linear DNA, GI:12018116
North-South	SSCP_A	AF309014.1	Ixodes scapularis haplotype SSCP A 16S ribosomal RNA gene, partial sequence; mitochondrial gene for mitochondrial product, 456 bp linear DNA, GI:12018117
North-South	SSCP_C	AF309015.1	Ixodes scapularis haplotype SSCP C 16S ribosomal RNA gene, partial sequence; mitochondrial gene for mitochondrial product, 456 bp linear DNA, GI:12018118
North-South	SSCP_NC22	AF309016.1	Ixodes scapularis haplotype SSCP NC_22 16S ribosomal RNA gene, partial sequence; mitochondrial gene for mitochondrial product, 457 bp linear DNA, GI:12018119
North-South	SSCP_L	AF309017.1	Ixodes scapularis haplotype SSCP L 16S ribosomal RNA gene, partial sequence; mitochondrial gene for mitochondrial product, 456 bp linear DNA, GI:12018120
North-South	SSCP_F	AF309018.1	Ixodes scapularis haplotype SSCP F 16S ribosomal RNA gene, partial sequence; mitochondrial gene for mitochondrial product, 456 bp linear DNA, GI:12018121
North-South	SSCP_K	AF309019.1	Ixodes scapularis haplotype SSCP K 16S ribosomal RNA gene, partial sequence; mitochondrial gene for mitochondrial product, 456 bp linear DNA, GI:12018122
North-South	SSCP_B	AF309020.1	Ixodes scapularis haplotype SSCP B 16S ribosomal RNA gene, partial sequence; mitochondrial gene for mitochondrial product, 456 bp linear DNA, GI:12018123
North-South	SSCP_I	AF309021.1	Ixodes scapularis haplotype SSCP I 16S ribosomal RNA gene, partial sequence; mitochondrial gene for mitochondrial product, 456 bp linear DNA, GI:12018124
North-South	SSCP_D	AF309022.1	Ixodes scapularis haplotype SSCP D 16S ribosomal RNA gene, partial sequence; mitochondrial gene for mitochondrial product, 456 bp linear DNA, GI:12018125
North-South	SSCP_E	AF309023.1	Ixodes scapularis haplotype SSCP E 16S ribosomal RNA gene, partial sequence; mitochondrial gene for mitochondrial product, 456 bp linear DNA, GI:12018126
North-South	SSCP_MA1	AF309024.1	Ixodes scapularis haplotype SSCP MA_1 16S ribosomal RNA gene, partial sequence; mitochondrial gene for mitochondrial product, 455 bp linear DNA, GI:12018127
North-South	SSCP_NC1_6	AF309025.1	Ixodes scapularis haplotype SSCP NC1_6 16S ribosomal RNA gene, partial sequence; mitochondrial gene for mitochondrial product, 456 bp linear DNA, GI:12018128
North-South	SSCP_J	AF309026.1	Ixodes scapularis haplotype SSCP J 16S ribosomal RNA gene, partial sequence; mitochondrial gene for mitochondrial product, 456 bp linear DNA, GI:12018129
North-South	SSCP_G	AF309027.1	Ixodes scapularis haplotype SSCP G 16S ribosomal RNA gene, partial sequence; mitochondrial gene for mitochondrial product, 456 bp linear DNA, GI:12018130
North-South	SSCP_H	AF309028.1	Ixodes scapularis haplotype SSCP H 16S ribosomal RNA gene, partial sequence; mitochondrial gene for mitochondrial product, 456 bp linear DNA, GI:12018131
North-South	SSCP_NY2_11	AF309029.1	Ixodes scapularis haplotype SSCP NY2_11 16S ribosomal RNA gene, partial sequence; mitochondrial gene for mitochondrial product, 456 bp linear DNA, GI:12018132
North-South	SSCP_NC2_29	AF309030.1	Ixodes scapularis haplotype SSCP NC2_29 16S ribosomal RNA gene, partial sequence; mitochondrial gene for mitochondrial product, 457 bp linear DNA, GI:12018133
North-South	Is1AL	L43862.1	Ixodes scapularis (isolate 1, strain Alabama) mitochondrial 16S ribosomal RNA (16S rDNA) gene fragment, 456 bp linear DNA, GI:1160991
North-South	Is6AL	L43870.1	Ixodes scapularis (isolate 6, strain Alabama) mitochondrial 16S ribosomal RNA (16S rDNA) gene fragment, 456 bp linear DNA, GI:1160999
North-South	Is2AL	L43875.1	Ixodes scapularis (isolate 2, strain Alabama) mitochondrial 16S ribosomal RNA (16S rDNA) gene fragment, 456 bp linear DNA, GI:1161004
Southern	Is2FL	L43876.1	Ixodes scapularis (isolate 2, strain Florida) mitochondrial 16S ribosomal RNA (16S rDNA) gene fragment, 455 bp linear DNA, GI:1161005
Southern	Is3FL	L43877.1	Ixodes scapularis (isolate 3, strain Florida) mitochondrial 16S ribosomal RNA (16S rDNA) gene fragment, 455 bp linear DNA, GI:1161006
Southern	Is7GA3	L43854.1	Ixodes scapularis (isolate 7, strain Georgia 3) mitochondrial 16S ribosomal RNA (16S rDNA) gene fragment 455 bp linear DNA GI:1160983
Southern	Is1GA3	L43855.1	Ixodes scapularis (isolate 1, strain Georgia 3) mitochondrial 16S ribosomal RNA (16S rDNA) gene fragment, 456 bp linear DNA, GI:1160984
Southern	Is4GA4	L43856	Ixodes scapularis (isolate 4, strain Georgia 4) mitochondrial 16S ribosomal RNA (16S rDNA) gene fragment, 456 bp linear DNA, L43856.1 GI:1160985
North-South	Is1GA4	L43859.1	Ixodes scapularis (isolate 1, strain Georgia 4) mitochondrial 16S ribosomal RNA (16S rDNA) gene fragment, 457 bp linear DNA, GI:1160988
North-South	Is2GA3	L43860.1	Ixodes scapularis (isolate 2, strain Georgia 3) mitochondrial 16S ribosomal RNA (16S rDNA) gene fragment, 456 bp linear DNA, GI:1160989
Southern	Is2GA2	L43861.1	Ixodes scapularis (isolate 2, strain Georgia 2) mitochondrial 16S ribosomal RNA (16S rDNA) gene fragment, 456 bp linear DNA, GI:1160990
Southern	Is3GA4	L43866.1	Ixodes scapularis (isolate 3, strain Georgia 4) mitochondrial 16S ribosomal RNA (16S rDNA) gene fragment, 456 bp linear DNA, GI:1160995
North-South	Is6GA2	L43868.1	Ixodes scapularis (isolate 6, strain Georgia 2) mitochondrial 16S ribosomal RNA (16S rDNA) gene fragment, 457 bp linear DNA, GI:1160997
North-South	Is1MA	L43857.1	Ixodes scapularis (isolate 1, strain Massachusetts) mitochondrial 16S ribosomal RNA (16S rDNA) gene fragment, 456 bp linear DNA, GI:1160986
North-South	Is1MN2	L43871.1	Ixodes scapularis (isolate 1, strain Minnesota 2) mitochondrial 16S ribosomal RNA (16S rDNA) gene fragment, 457 bp linear DNA, GI:1161000
North-South	Is4MN4	L43872.1	Ixodes scapularis (isolate 4, strain Minnesota 4) mitochondrial 16S ribosomal RNA (16S rDNA) gene fragment, 457 bp linear DNA, GI:1161001
North-South	Is1MS	L43873.1	Ixodes scapularis (isolate 1, strain Mississippi) mitochondrial 16S ribosomal RNA (16S rDNA) gene fragment, 457 bp linear DNA, I:1161002
Southern	Is2NC	L43863.1	Ixodes scapularis (isolate 2, strain North Carolina) mitochondrial 16S ribosomal RNA (16S rDNA) gene fragment, 456 bp linear DNA, GI:3885306
Southern	Is5NC	L43864.1	Ixodes scapularis (isolate 5, strain North Carolina) mitochondrial 16S ribosomal RNA (16S rDNA) gene fragment, 455 bp linear DNA, GI:1160993
North-South	Is1OK	L43858.1	Ixodes scapularis (isolate 1, strain Oklahoma) mitochondrial 16S ribosomal RNA (16S rDNA) gene fragment, 456 bp linear DNA, GI:1160987
Southern	Is3OK	L43865.1	Ixodes scapularis (isolate 3, strain Oklahoma) mitochondrial 16S ribosomal RNA (16S rDNA) gene fragment, 455 bp linear DNA, GI:1160994
North-South	Is4OK	L43867.1	Ixodes scapularis (isolate 4, strain Oklahoma) mitochondrial 16S ribosomal RNA (16S rDNA) gene fragment, 456 bp linear DNA, GI:1160996
North-South	Is5OK	L43869.1	Ixodes scapularis (isolate 5, strain Oklahoma) mitochondrial 16S ribosomal RNA (16S rDNA) gene fragment, 456 bp linear DNA, GI:1160998
Southern	Is1SC	L43874.1	Ixodes scapularis (isolate 1, strain South Carolina) mitochondrial 16S ribosomal RNA (16S rDNA) gene fragment, 455 bp linear DNA, GI:1161003
North-South	MSF03_COI_98%	This_study	Mississippi_Ixodes_scapularis_female	0.98
Southern	MSF06_COI_94%	This_study	Mississippi_Ixodes_scapularis_female	0.94
North-South	MSG02_COI_99%	This_study	Mississippi_Ixodes_scapularis_female	0.99
North-South	MSG03_COI_98%	This_study	Mississippi_Ixodes_scapularis_female	0.98
North-South	MSG04_COI_97%	This_study	Mississippi_Ixodes_scapularis_female	0.97
North-South	MSG07_COI_99%	This_study	Mississippi_Ixodes_scapularis_female	0.99
North-South	MSG09_COI_99%	This_study	Mississippi_Ixodes_scapularis_female	0.99
Southern	MSG11_COI_93%	This_study	Mississippi_Ixodes_scapularis_female	0.93
North-South	MSUA_I_brunneus	This_study	MSU_unknown_A_Ixodes_brunneus
North-South	MSUB_I_scapularis	This_study	MSU_unknown_B_Ixodes_scapularis
North-South	MSUC_I_affinis	This_study	MSU_unknown_C_Ixodes_affinis
Southern	MSUD_I_scapularis	This_study	MSU_unknown_D_Ixodes_scapularis
North-South	PA_BHF2	This_study	Pennsylvania_Ixodes_scapularis_female
North-South	DAM1	U14145.1	Ixodes dammini DAM1 mitochondrial 16S ribosomal RNA, mitochondrial gene, partial sequence, 337 bp linear DNA, GI:606727
Southern	SCAP1	U14156.1	Ixodes scapularis SCAP1 mitochondrial 16S ribosomal RNA, mitochondrial gene, partial sequence, 337 bp linear DNA, GI:606738
Southern	SCAP2	U14157.1	Ixodes scapularis SCAP2 mitochondrial 16S ribosomal RNA, mitochondrial gene, partial sequence, 337 bp linear DNA, GI:606739
North-South	Id_CT93	U26600.1	Ixodes dammini strain CT93 16S ribosomal RNA gene, partial sequence; mitochondrial, 338 bp linear DNA, GI:1163145
Southern	Is_FL92a	U26601.1	Ixodes scapularis strain FL92a 16S ribosomal RNA gene, partial sequence; mitochondrial, 338 bp linear DNA, GI:1163165
Southern	Is_FL93	U26603.1	Ixodes scapularis strain FL93 16S ribosomal RNA gene, partial sequence; mitochondrial, 338 bp linear DNA, GI:1163167
Southern	Is_GA93	U26604.1	Ixodes scapularis strain GA93 16S ribosomal RNA gene, partial sequence; mitochondrial, 339 bp linear DNA, GI:1163168
North-South	Id_IL94	U26605.1	Ixodes dammini strain IL94 16S ribosomal RNA gene, partial sequence; mitochondrial, 338 bp linear DNA, GI:1163146
North-South	Id_MA92b	U26607.1	Ixodes dammini strain MA92b 16S ribosomal RNA gene, partial sequence; mitochondrial, 338 bp linear DNA, GI:1163148
North-South	Id_MA92c	U26608.1	Ixodes dammini strain MA92c 16S ribosomal RNA gene, partial sequence; mitochondrial, 338 bp linear DNA, GI:1163149
North-South	Id_MD94	U26609.1	Ixodes dammini strain MD94 16S ribosomal RNA gene, partial sequence; mitochondrial, 338 bp linear DNA, GI:1163150
North-South	Id_NJ92	U26610.1	Ixodes dammini strain NJ92 16S ribosomal RNA gene, partial sequence; mitochondrial, 338 bp linear DNA, GI:1163151
North-South	Id_ME92a	U26611.1	Ixodes dammini strain ME92a 16S ribosomal RNA gene, partial sequence; mitochondrial, 338 bp linear DNA, GI:1163152
North-South	Id_ME92b	U26612.1	Ixodes dammini strain ME92b 16S ribosomal RNA gene, partial sequence; mitochondrial, 338 bp linear DNA, GI:1163153
North-South	Id_MS93	U26613.1	Ixodes dammini strain MS93 16S ribosomal RNA gene, partial sequence; mitochondrial, 338 bp linear DNA, GI:1163154
North-South	Id_NC93b	U26615.1	Ixodes dammini strain NC93b 16S ribosomal RNA gene, partial sequence; mitochondrial, 338 bp linear DNA, GI:1163155
North-South	Id_NC93c	U26616.1	Ixodes dammini strain NC93c 16S ribosomal RNA gene, partial sequence; mitochondrial, 338 bp linear DNA, GI:1163156
North-South	Id_NC94	U26617.1	Ixodes dammini strain NC94 16S ribosomal RNA gene, partial sequence; mitochondrial, 338 bp linear DNA, GI:1163157
North-South	Id_WI93	U26618.1	Ixodes dammini strain WI93 16S ribosomal RNA gene, partial sequence; mitochondrial, 338 bp linear DNA, GI:1163158
North-South	Id_WI92b	U26619.1	Ixodes dammini strain WI92b 16S ribosomal RNA gene, partial sequence; mitochondrial, 338 bp linear DNA, GI:1163159
North-South	Id_WI92a	U26620.1	Ixodes dammini strain WI92a 16S ribosomal RNA gene, partial sequence; mitochondrial, 338 bp linear DNA, GI:1163160
North-South	Id_OK94	U26622.1	Ixodes dammini strain OK94 16S ribosomal RNA gene, partial sequence; mitochondrial, 339 bp linear DNA, GI:1163162
North-South	Id_SC93	U26623.1	Ixodes dammini strain SC93 16S ribosomal RNA gene, partial sequence; mitochondrial, 338 bp linear DNA, GI:1163163
Southern	Is_TX94	U26624.1	Ixodes scapularis strain TX94 16S ribosomal RNA gene, partial sequence; mitochondrial, 338 bp linear DNA, GI:1163170
